# Supplementary material for: Identification of prognostic factors of chronic pulmonary aspergillosis: a retrospective cohort of 106 patients
Source: PubMed Central journal article supplement — J Thorac Dis. 2024 Nov 14;16(11):7310–9. doi: 10.21037/jtd-24-831 (PMC11635279; doi:10.21037/jtd-24-831), 2024-11-14
Supplement: jtd-16-11-7310-rc.pdf [file jtd-16-11-7310-rc.pdf]

**STROBE Statement—checklist of items that should be included in reports of observational studies**

| Section/item             | Item No | Recommendation                                                                                                                                                                                                                                                                                                                                                                                                                                                         | Reported on Page Number/Line Number | Reported on Section/Paragraph    |
|--------------------------|---------|------------------------------------------------------------------------------------------------------------------------------------------------------------------------------------------------------------------------------------------------------------------------------------------------------------------------------------------------------------------------------------------------------------------------------------------------------------------------|-------------------------------------|----------------------------------|
| Title and abstract       | 1       | (a) Indicate the study’s design with a commonly used term in the title or the abstract                                                                                                                                                                                                                                                                                                                                                                                 | Page 4 line 5                       | Title and Abstract/Methods.      |
|                          |         | (b) Provide in the abstract an informative and balanced summary of what was done and what was found                                                                                                                                                                                                                                                                                                                                                                    | Page 4-5                            | Abstract/Methods and Conclusions |
| Introduction             |         |                                                                                                                                                                                                                                                                                                                                                                                                                                                                        |                                     |                                  |
| Background/<br>rationale | 2       | Explain the scientific background and rationale for the investigation being reported                                                                                                                                                                                                                                                                                                                                                                                   | Page 6-7                            | Introduction/ Paragraph 1-3      |
| Objectives               | 3       | State specific objectives, including any prespecified hypotheses                                                                                                                                                                                                                                                                                                                                                                                                       | Page 7 line 21-22                   | Introduction/ Paragraph 4        |
| Methods                  |         |                                                                                                                                                                                                                                                                                                                                                                                                                                                                        |                                     |                                  |
| Study design             | 4       | Present key elements of study design early in the paper                                                                                                                                                                                                                                                                                                                                                                                                                | Page 8 line 4-6                     | Methods/Paragraph 1<br>?/        |
| Setting                  | 5       | Describe the setting, locations, and relevant dates, including periods of recruitment, exposure, follow-up, and data collection                                                                                                                                                                                                                                                                                                                                        | Page 8 line 4-6                     | Methods/Paragraph 1              |
| Participants             | 6       | (a) <i>Cohort study</i> —Give the eligibility criteria, and the sources and methods of selection of participants. Describe methods of follow-up<br><i>Case-control study</i> —Give the eligibility criteria, and the sources and methods of case ascertainment and control selection. Give the rationale for the choice of cases and controls<br><i>Cross-sectional study</i> —Give the eligibility criteria, and the sources and methods of selection of participants | Page 8 line 7-22<br>Page 9 line 1-4 | Methods/Paragraph 1              |
|                          |         | (b) <i>Cohort study</i> —For matched studies, give matching criteria and number of exposed and unexposed<br><i>Case-control study</i> —For matched studies, give matching criteria and the number of controls per case                                                                                                                                                                                                                                                 |                                     |                                  |
| Variables                | 7       | Clearly define all outcomes, exposures, predictors, potential confounders, and effect modifiers.<br>Give diagnostic criteria, if applicable                                                                                                                                                                                                                                                                                                                            | Page 9 line 5-16                    | Methods/Paragraph 2              |

|                              |    |                                                                                                                                                                                         |                   |                     |
|------------------------------|----|-----------------------------------------------------------------------------------------------------------------------------------------------------------------------------------------|-------------------|---------------------|
| Data sources/<br>measurement | 8* | For each variable of interest, give sources of data and details of methods of assessment (measurement).<br>Describe comparability of assessment methods if there is more than one group | Page 8 Line 17-18 | Methods/Paragraph 1 |
| Bias                         | 9  | Describe any efforts to address potential sources of bias                                                                                                                               | -                 | -                   |
| Study size                   | 10 | Explain how the study size was arrived at                                                                                                                                               | Page 8 line 4-6   | Methods/Paragraph 1 |
| Quantitative<br>variables    | 11 | Explain how quantitative variables were handled in the analyses. If applicable, describe which groupings were chosen and why                                                            | Page 9 line 18-19 | Methods/Paragraph 2 |

|                     |     |                                                                                                                                                                                                                                                                                                           |                                       |                                          |
|---------------------|-----|-----------------------------------------------------------------------------------------------------------------------------------------------------------------------------------------------------------------------------------------------------------------------------------------------------------|---------------------------------------|------------------------------------------|
| Statistical methods | 12  | (a) Describe all statistical methods, including those used to control for confounding                                                                                                                                                                                                                     | Page 9 line 19-22 to page 10 line 1-2 | Methods/Paragraph 2                      |
|                     |     | (b) Describe any methods used to examine subgroups and interactions                                                                                                                                                                                                                                       | Page 9 line 19-20                     | -                                        |
|                     |     | (c) Explain how missing data were addressed                                                                                                                                                                                                                                                               | Page 9 line 15-16                     | -                                        |
|                     |     | (d) <i>Cohort study</i> —If applicable, explain how loss to follow-up was addressed<br><i>Case-control study</i> —If applicable, explain how matching of cases and controls was addressed<br><i>Cross-sectional study</i> —If applicable, describe analytical methods taking account of sampling strategy | Page 9 line 15-16                     | Methods/Paragraph 2                      |
|                     |     | (e) Describe any sensitivity analyses                                                                                                                                                                                                                                                                     | -                                     | Methods/Paragraph 2                      |
| Results             |     |                                                                                                                                                                                                                                                                                                           |                                       |                                          |
| Participants        | 13* | (a) Report numbers of individuals at each stage of study—eg numbers potentially eligible, examined for eligibility, confirmed eligible, included in the study, completing follow-up, and analysed                                                                                                         | Page 10 line 5                        | Results/ Paragraph 1                     |
|                     |     | (b) Give reasons for non-participation at each stage                                                                                                                                                                                                                                                      | -                                     | -                                        |
|                     |     | (c) Consider use of a flow diagram                                                                                                                                                                                                                                                                        | -                                     | -                                        |
| Descriptive data    | 14* | (a) Give characteristics of study participants (eg demographic, clinical, social) and information on exposures and potential confounders                                                                                                                                                                  | Page 10 line 6-8                      | Results/ Paragraph 1                     |
|                     |     | (b) Indicate number of participants with missing data for each variable of interest                                                                                                                                                                                                                       | -                                     | -                                        |
|                     |     | (c) <i>Cohort study</i> —Summarise follow-up time (eg, average and total amount)                                                                                                                                                                                                                          | -                                     | -                                        |
| Outcome data        | 15* | <i>Cohort study</i> —Report numbers of outcome events or summary measures over time                                                                                                                                                                                                                       | Page 10 line 21                       | Results/ Paragraph 3                     |
|                     |     | <i>Case-control study</i> —Report numbers in each exposure category, or summary measures of exposure                                                                                                                                                                                                      | -                                     | -                                        |
|                     |     | <i>Cross-sectional study</i> —Report numbers of outcome events or summary measures                                                                                                                                                                                                                        | -                                     | -                                        |
| Main results        | 16  | (a) Give unadjusted estimates and, if applicable, confounder-adjusted estimates and their precision (eg, 95% confidence interval). Make clear which confounders were adjusted for and why they were included                                                                                              | Page 12 line 2-17                     | Table 3, Results/ Paragraph 4            |
|                     |     | (b) Report category boundaries when continuous variables were categorized                                                                                                                                                                                                                                 | Page 10 line 6                        | Methods/Paragraph 1, Results/Paragraph 1 |
|                     |     | (c) If relevant, consider translating estimates of relative risk into absolute risk for a meaningful time                                                                                                                                                                                                 | -                                     | -                                        |

|                |    |                                                                                                                                                            |                    |                        |
|----------------|----|------------------------------------------------------------------------------------------------------------------------------------------------------------|--------------------|------------------------|
| Other analyses | 17 | Report other analyses done—eg analyses of subgroups and interactions, and sensitivity analyses                                                             | Page 11 line 3-10  | Results/ Paragraph 3   |
| Discussion     |    |                                                                                                                                                            |                    |                        |
| Key results    | 18 | Summarise key results with reference to study objectives                                                                                                   | Page 12 line 20-22 | Discussion/Paragraph 1 |
| Limitations    | 19 | Discuss limitations of the study, taking into account sources of potential bias or imprecision. Discuss both direction and magnitude of any potential bias | Page 17 line 1-5   | Discussion/Paragraph 7 |

|                   |    |                                                                                                                                                                            |                    |                          |
|-------------------|----|----------------------------------------------------------------------------------------------------------------------------------------------------------------------------|--------------------|--------------------------|
| Interpretation    | 20 | Give a cautious overall interpretation of results considering objectives, limitations, multiplicity of analyses, results from similar studies, and other relevant evidence | Page 13-16         | Discussion/Paragraph 1-6 |
| Generalisability  | 21 | Discuss the generalisability (external validity) of the study results                                                                                                      | Page 13-16         | Discussion/Paragraph 1-6 |
| Other information |    |                                                                                                                                                                            |                    |                          |
| Funding           | 22 | Give the source of funding and the role of the funders for the present study and, if applicable, for the original study on which the present article is based              | Page 17 line 14-15 | Acknowledgements         |

\*Give information separately for cases and controls in case-control studies and, if applicable, for exposed and unexposed groups in cohort and cross-sectional studies.

Note: An Explanation and Elaboration article discusses each checklist item and gives methodological background and published examples of transparent reporting. The STROBE checklist is best used in conjunction with this article (freely available on the Web sites of PLoS Medicine at <http://www.plosmedicine.org/>, Annals of Internal Medicine at <http://www.annals.org/>, and Epidemiology at <http://www.epidem.com/>). Information on the STROBE Initiative is available at [www.strobe-statement.org](http://www.strobe-statement.org).

Article information: <https://dx.doi.org/10.21037/jtd-24-831>

\*As the checklist was provided upon initial submission, the page number/line number reported may be changed due to copyediting and may not be referable in the published version. In this case, the section/paragraph may be used as an alternative reference.
